# Supplementary material
Source: PubMed Central journal article supplement (PMC8122087)
Supplement: NIHMS1692737-supplement-1.pdf [file NIHMS1692737-supplement-1.pdf]

## Supplementary Data 1. PsychLight1 and psychLight2 protein sequences. Related to STAR Methods.

psychLight1.prot (695 aa)

---

MKTIIALSYIFCLVFADYKDDDDAMDILCEENTSLSSSTTNSLMQLNDDTRLYSND  
1| 10| 20| 30| 40| 50|

FNSGEANTSDAFNWTVDSENRTNLSCEGCLSPSCLSLLLHLQEKNWSALLTAVVII  
60| 70| 80| 90| 100| 110|

LTIAGNILVIMAVSLEKKLQ NATNYFLMSLAIADMLLGFLVMPVSMILTILYGYRW  
120| 130| 140| 150| 160|

PLPSKLCVWIIYLDVLFSTASIMHLCAISLDRYVAIQNPAHHSRFSNSRTKAFLEKI  
170| 180| 190| 200| 210| 220|

IAVWTISVGISMPIPVFGLQDDSKVFKEGSCLLADDNFVLI GSFVSFFIPLTIMV  
230| 240| 250| 260| 270|

ITYFLTIKSLQKQLSSGYNVYIKADKQKNGIKANFKIRHNI EDGGVQLAYHYQQN  
280| 290| 300| 310| 320| 330|

TPIGDGPVLLPDNHYSVQSKLSKDPNEKRDMVLL E FVTAAGITLGMDELYKGG  
340| 350| 360| 370| 380|

TGGSMVSKGEELFTGVVPILVELDGDVNGHKFSVSGEGEGDATY GKLTLKFICTT  
390| 400| 410| 420| 430| 440|

GKLPVPWPTLVTTLT YGVQCFSRYPDHMKQHDFFKSAMPEGYIQERTIFFKDDGN  
450| 460| 470| 480| 490|

YKTRAEVKFEGDTLVNRIELKGIDFKEDGNILGHKLEYNMHDQLNEQKACKVLGI  
500| 510| 520| 530| 540| 550|

VFFLFVVMWCPFFITNIMAVICKESCNE D VIGALLNVFVWIGYLSAVNPLVYTL  
560| 570| 580| 590| 600|

FNKTYRSAFSRYIQCYKENKKPLQLILVNTIPALAYKSSQLQMGQKKNSKQDAK  
610| 620| 630| 640| 650| 660|

TTDNDCSMVALGKQHSEEASKDNSDGVNEKVSCV\*  
670| 680| 690| 695|

---

MKTIIALS YIFCLVFADYKDDDDAMDILCEENTSLSSSTTNSLMQLNDDTRLYSND  
1| 10| 20| 30| 40| 50|

FNSGEANTS DAFNWTVDSENRTNLSCEGCLSPSCLSLHLQEKNEWSALLTAVVII  
60| 70| 80| 90| 100| 110|

LTIAGNILVIMAVSLEKKLQ NATNYFLMSLAIADMLLGFLVMPVSMILTILYGYRW  
120| 130| 140| 150| 160|

PLPSKLC AVWIYLDVLFSTASIMHLCAISLD RYVAIQNPKHHSRFRNSRTKAFLKI  
170| 180| 190| 200| 210| 220|

I AVWTISVGI SMPIPVFGLQDDSKVFKEGSCLLADDNFVLIGSFVSFFIPLTIMV  
230| 240| 250| 260| 270|

ITYFLT I KSLQKQLSSGYNVYIKADKQKNGIKANFKIRHNI EDGGVQLAYHYQQN  
280| 290| 300| 310| 320| 330|

TPIGDGPVLLPDNH YLSVQSKLSKDPNEKRDMVLL E FVTAAGITLGMDELYKGG  
340| 350| 360| 370| 380|

TGGSMVSKGEELFTGVVPILVELDGDVNGHKFSVSGEGEGDATY GKLTLKFICTT  
390| 400| 410| 420| 430| 440|

GKLPVPWPTLVTTLYGVQCFSRYPDHMKQHDFFKSAMPEGYIQERTIFFKDDGN  
450| 460| 470| 480| 490|

YKTRAEVKFEGDTLVNRIELKGIDFKEDGNILGHKLEYNFMHDQLNEQKACKVL  
500| 510| 520| 530| 540| 550|

GIVFFLFVVMWCPFFITNIMAVICKESCNE D VIGALLNVFVWIGYLSSAVNPLVY  
560| 570| 580| 590| 600|

TLFNKTYRSAFSRYIQCYKENKKPLQLILVNTIPALAYKSSQLQMGQKKN SKQD  
610| 620| 630| 640| 650| 660|

AKTTDNDCSMVALGKQHSEEASKDNSDGVNEKVSCVFCYENEV\*  
670| 680| 690| 700| 704

Supplementary Data 2. Novel compound characterizations. Related to STAR Methods.

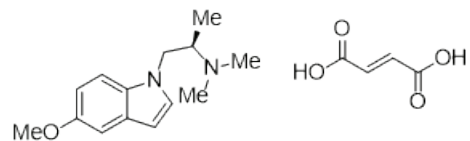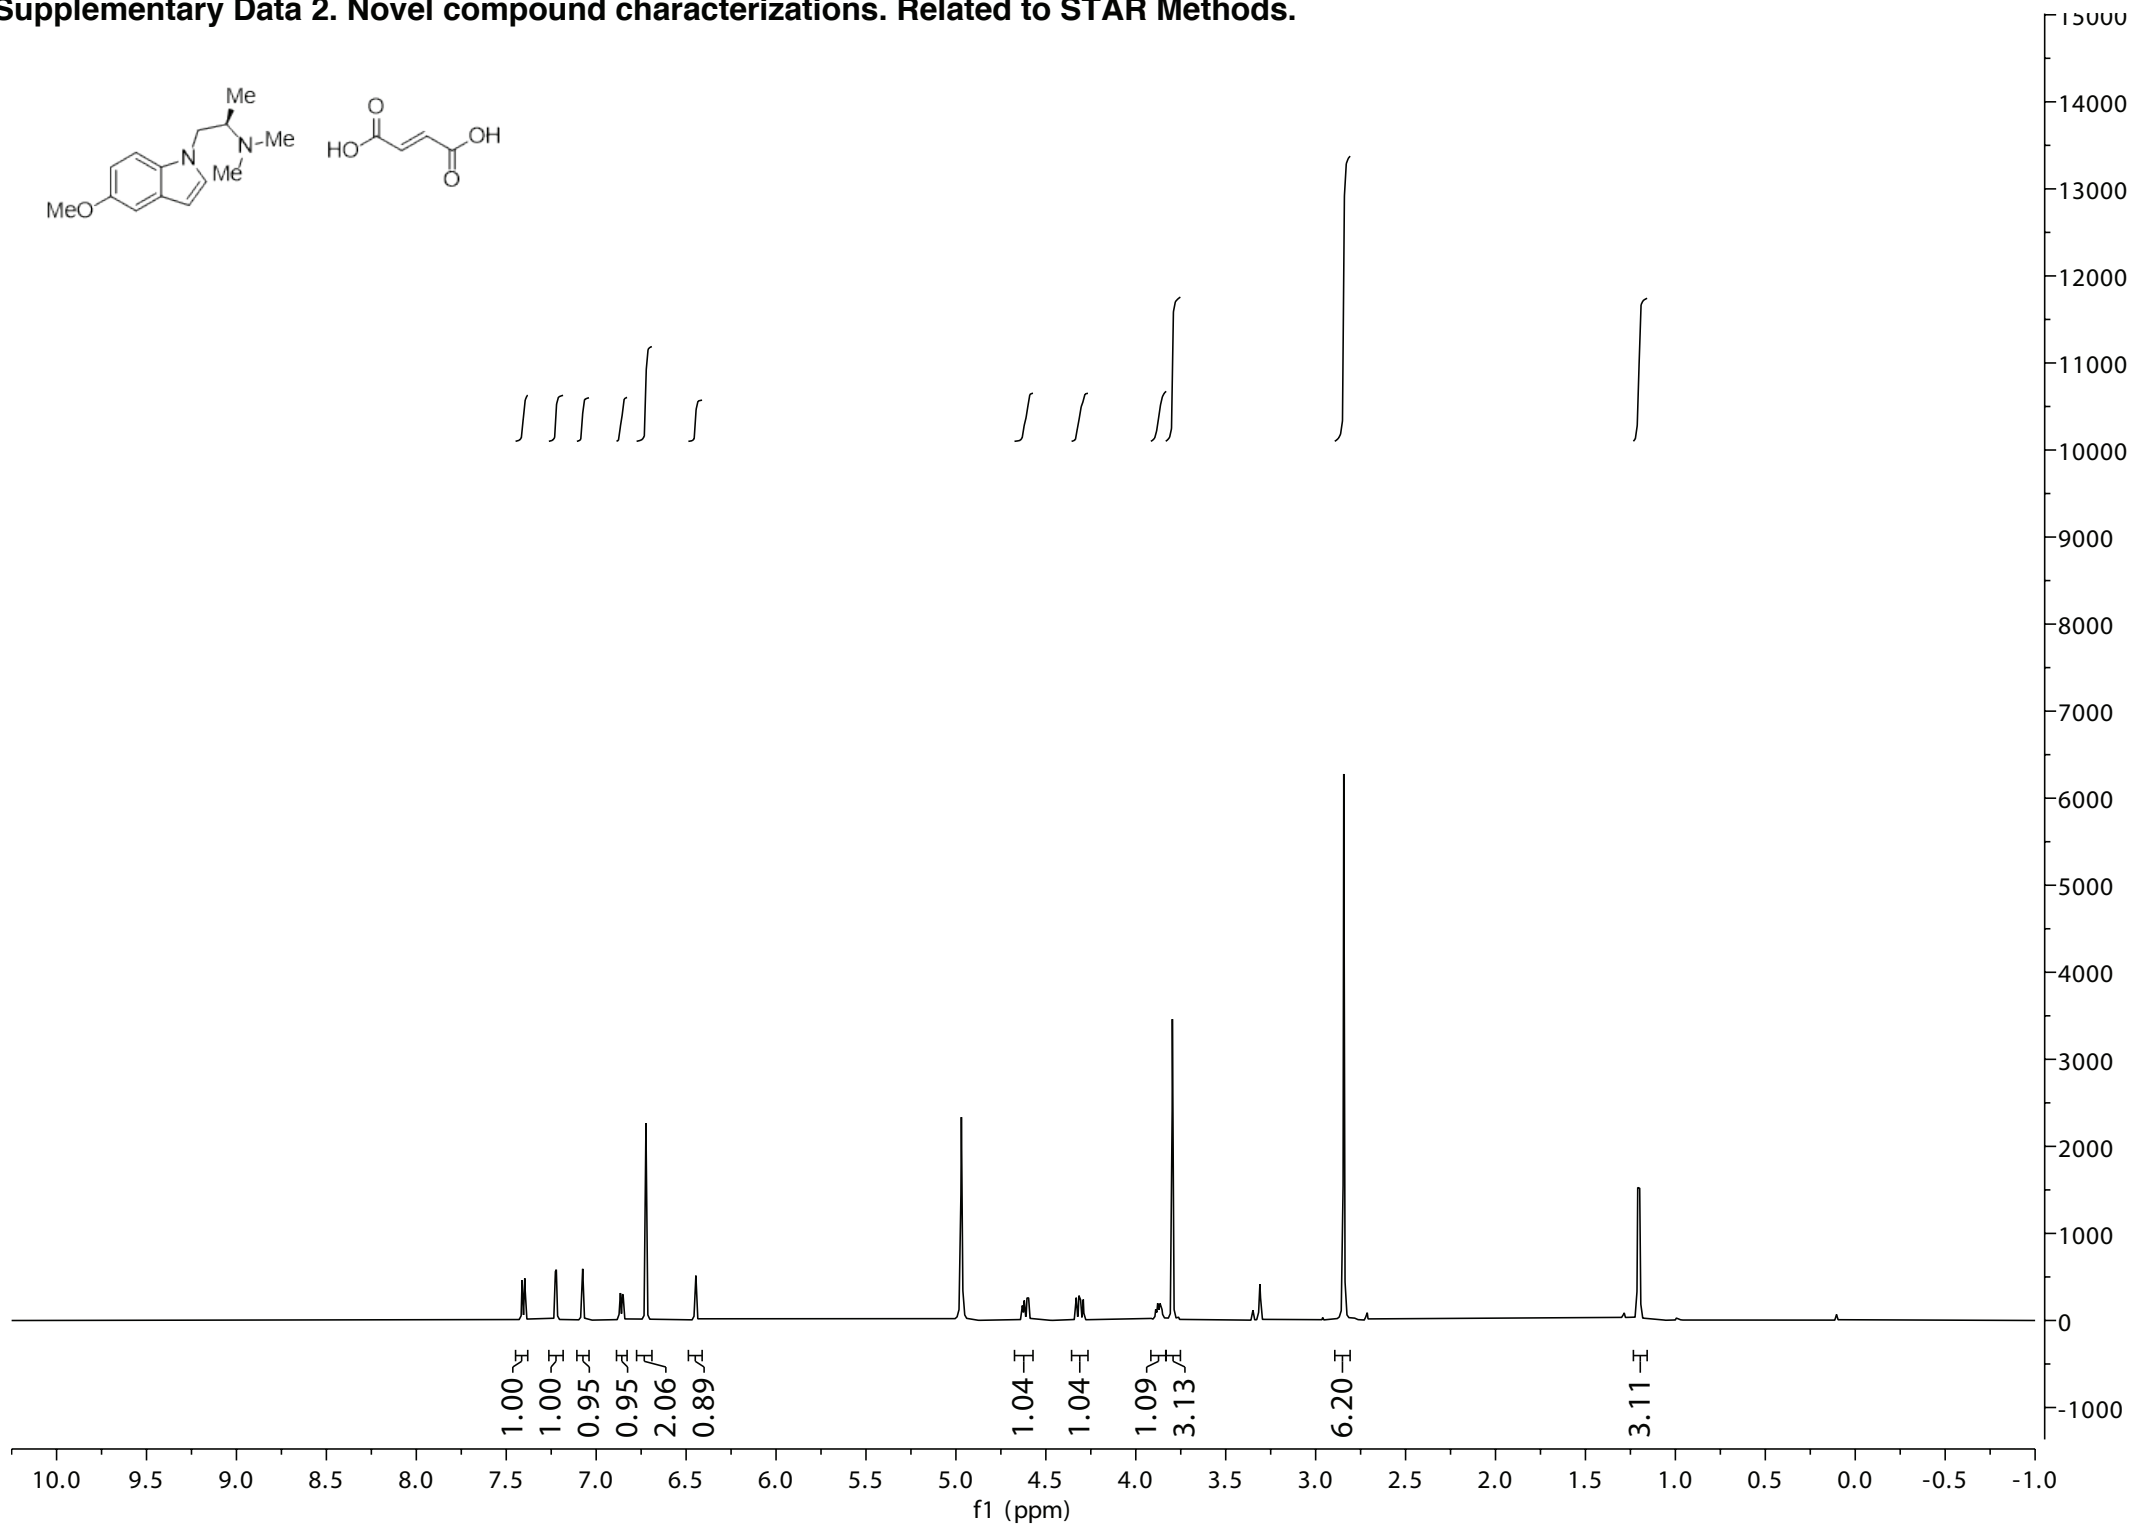

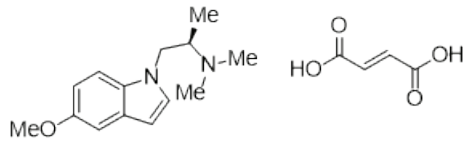

— 171.02

— 155.79

— 136.10

— 132.80

— 130.86

— 129.72

— 113.31

— 111.16

— 103.81

— 103.31

— 61.63

— 56.15

— 47.47

— 39.98

— 11.72

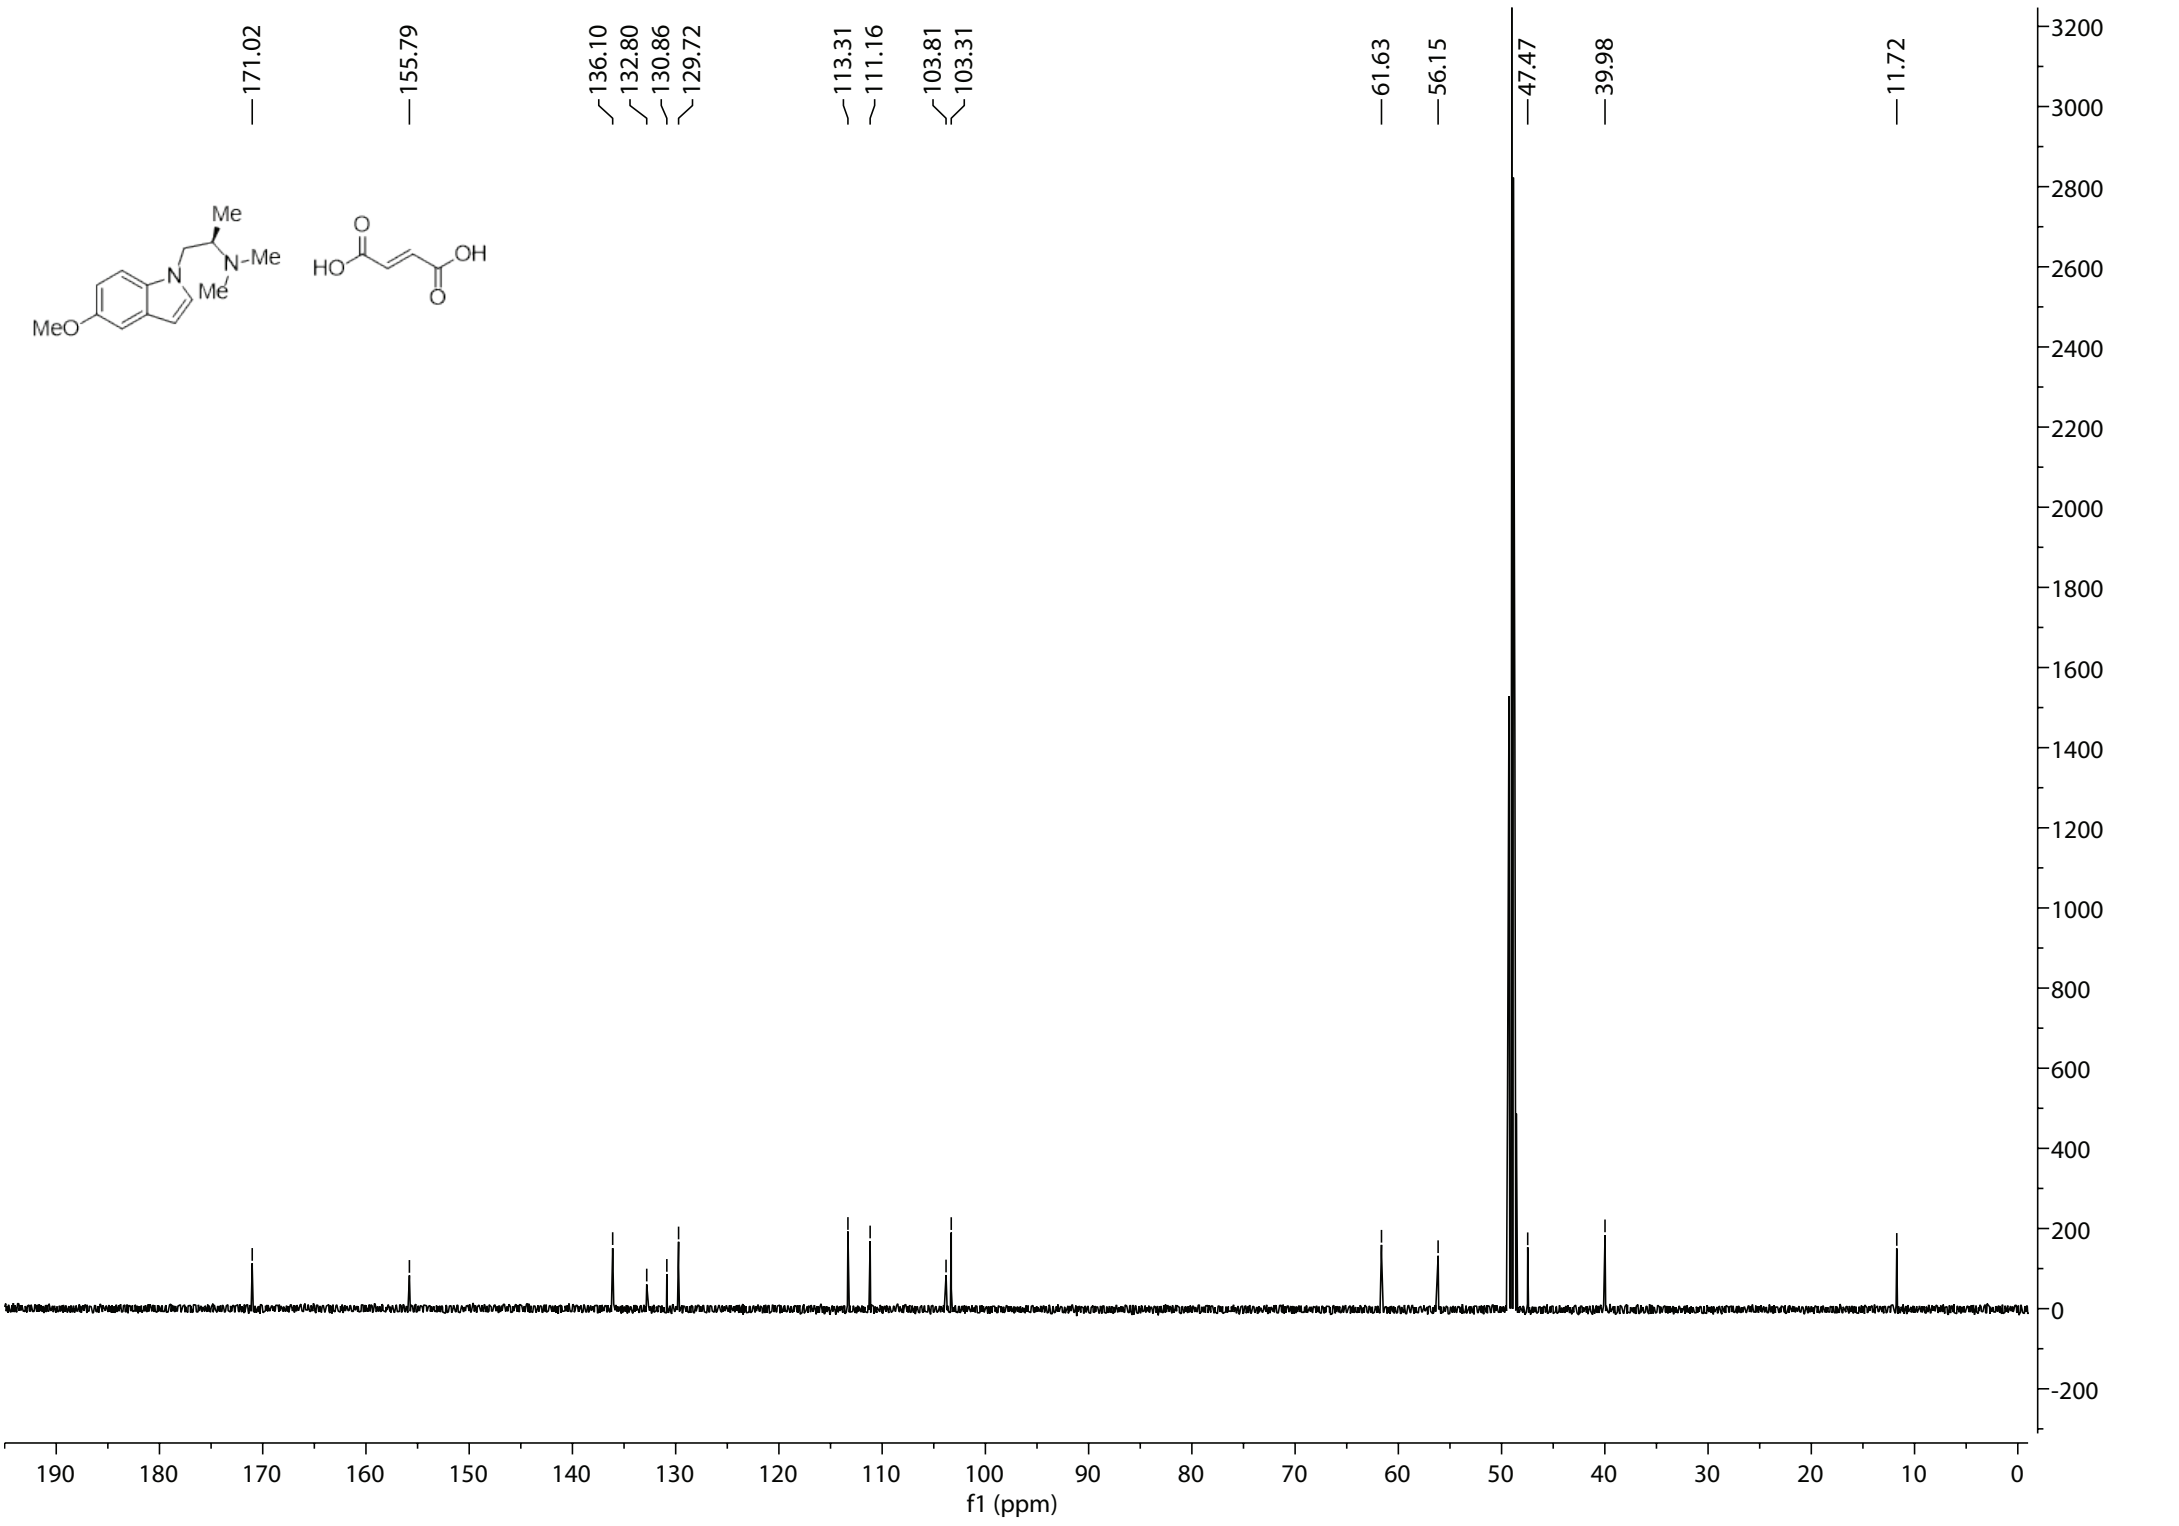

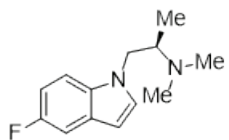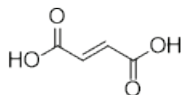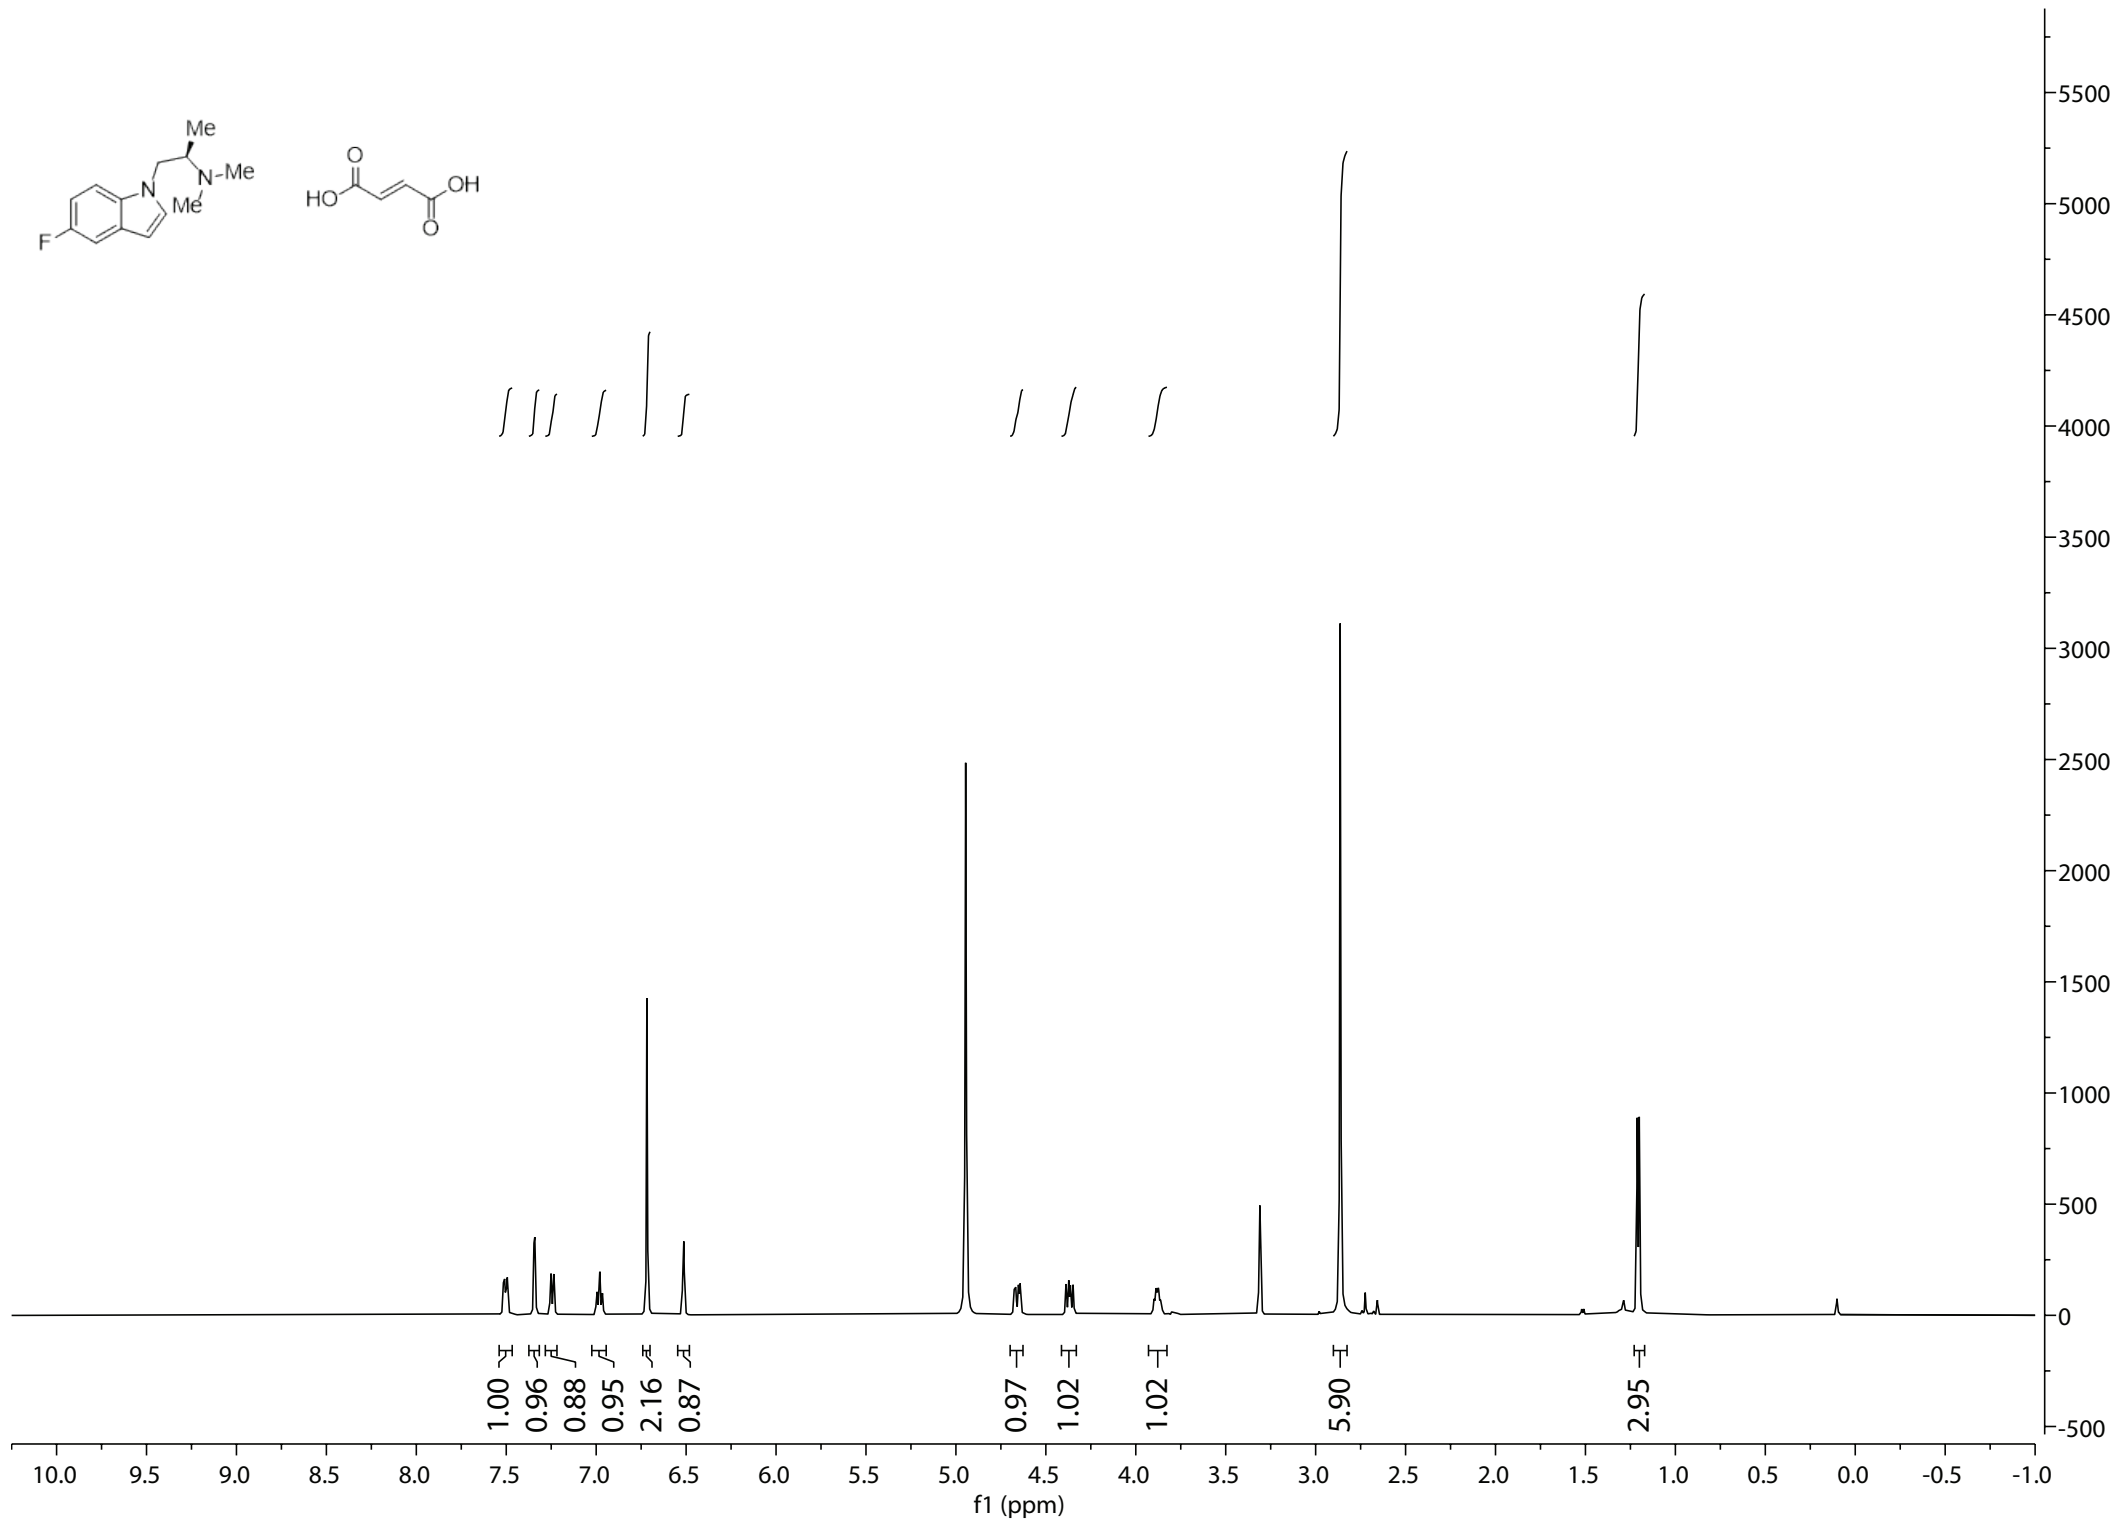

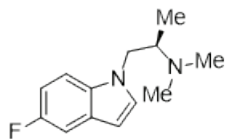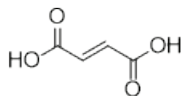

— 170.95

— 160.22

— 158.67

— 136.08

— 134.25

— 131.08

— 130.77

— 130.70

— 111.46

— 111.40

— 111.28

— 111.10

— 106.66

— 106.51

— 103.59

— 103.56

— 61.54

— 47.59

— 40.04

— 11.64

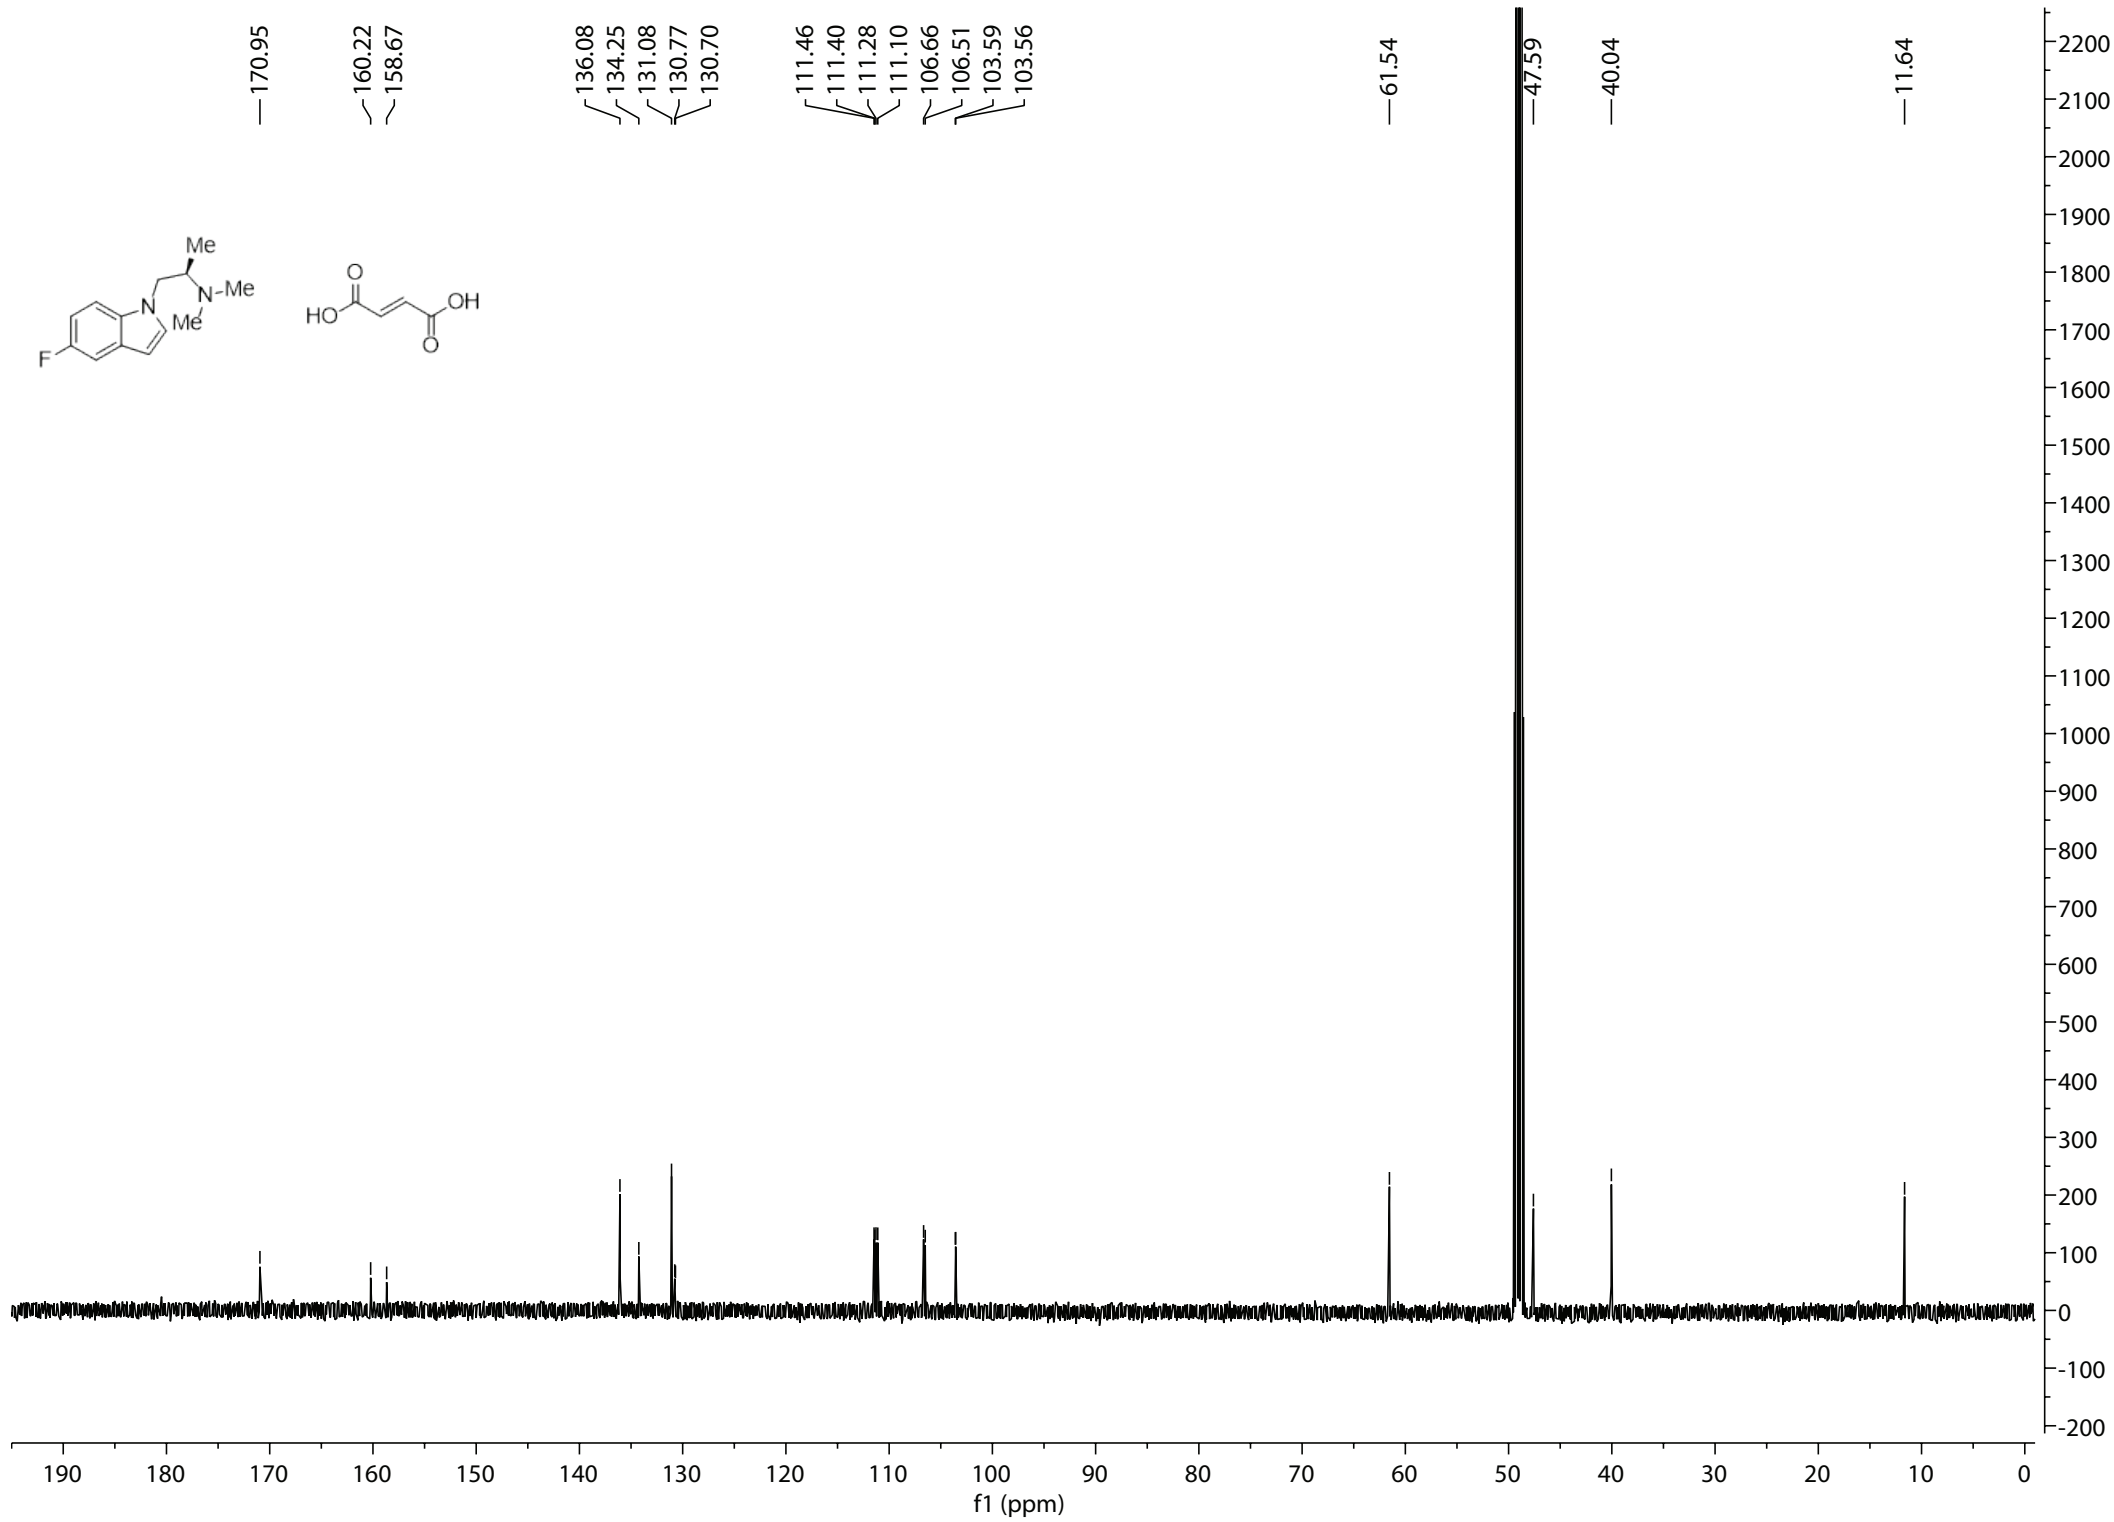

**Supplementary Table 1. Overview of experimental design and results. Related to all Figures.**

| Question                                                                                                              | Approach                                                                                                                                              | Results                                                                                                                                                                                                                                        | Figures                  |
|-----------------------------------------------------------------------------------------------------------------------|-------------------------------------------------------------------------------------------------------------------------------------------------------|------------------------------------------------------------------------------------------------------------------------------------------------------------------------------------------------------------------------------------------------|--------------------------|
| <b>Development of psychLight for imaging serotonin and hallucinogens</b>                                              |                                                                                                                                                       |                                                                                                                                                                                                                                                |                          |
| Can we design a sensor to probe ligand-induced conformational changes of 5-HT2A receptor?                             | → We replaced the third intracellular loop of the 5-HT2A receptor with cpGFP followed by linker screening and membrane localization optimization      | → psychLight responded to serotonin, but not to 5-HT2AR antagonists. Serotonin displayed an $EC_{50} = 26.3$ nM                                                                                                                                | → Figure 1A–D            |
| What is the sensitivity and kinetics of psychLight?                                                                   | → Two-photon uncaging and imaging of serotonin in cultured cortical slices                                                                            | → psychLight displayed fast off kinetics (5.4 ms) in response to single pulse uncaging (10ms)                                                                                                                                                  | → Figure 1E–H            |
|                                                                                                                       | → Two-photon imaging of serotonin release triggered by electrical stimuli in acute slices                                                             | → psychLight was able to detect electrically-evoked serotonin release in BNST acute slices. The fluorescence response can be modulated by a SSRI and abolished by a sodium channel blocker TTX and a serotonin receptor antagonist granisetron | → Figure 1I–M            |
| <b>In vivo imaging of serotonin release in multiple brain regions with fiber photometry</b>                           |                                                                                                                                                       |                                                                                                                                                                                                                                                |                          |
| Can psychLight detect behaviorally relevant serotonin release?                                                        | → We applied fiber photometry to study endogenous serotonin release in DRN, BNST, BLA, and OFC triggered by auditory fear conditioning                | → psychLight can faithfully detect the serotonin dynamics across the full-course of fear-learning in single trials ( $d > 12$ ).                                                                                                               | → Figure 2               |
| <b>Imaging hallucinogenic conformations of 5-HT2AR</b>                                                                |                                                                                                                                                       |                                                                                                                                                                                                                                                |                          |
| Can psychLight be used to detect activation of 5-HT2AR by hallucinogens in vivo?                                      | → In vivo fiber-photometry recording in mPFC                                                                                                          | → Fluorescence increased upon administration of 5-MeO-DMT and the onset of increase correlated with the head-twitch response                                                                                                                   | → Figure 3A–C            |
| How effectively do hallucinogenic compounds activate psychLight?                                                      | → Concentration-response curve in 293T cells                                                                                                          | → Determined $EC_{50}$ values for a panel of hallucinogens                                                                                                                                                                                     | → Figure 3D–G            |
|                                                                                                                       |                                                                                                                                                       | → PsychLight $EC_{50}$ values correlate with human hallucinogenic potency                                                                                                                                                                      | → Figure 3H              |
|                                                                                                                       |                                                                                                                                                       | → PsychLight response is not equivalent to other measures of 5-HT2AR activation                                                                                                                                                                | → Figure 3I              |
| <b>Medium-throughput pharmacological assay based on psychLight</b>                                                    |                                                                                                                                                       |                                                                                                                                                                                                                                                |                          |
| Can we use psychLight to establish a cell-based assay for determining hallucinogenic potentials of library compounds? | → Engineered HEK293T cell line stably expressing psychLight2                                                                                          | → Z-score of the assay is 0.6                                                                                                                                                                                                                  | → Figure S3D             |
|                                                                                                                       |                                                                                                                                                       | → The assay is sensitive to compounds with similar molecular structures                                                                                                                                                                        | → Figure 4B–C            |
|                                                                                                                       |                                                                                                                                                       | → Defined a ligand score to predict the pharmacological features of compounds:<br>Ligand score >0: 5-HT2AR-activating hallucinogens<br>Ligand score <0: non-hallucinogenic 5-HT2AR ligands<br>Ligand score ~0: not 5HT2AR ligands              | → Figure 4D–E            |
|                                                                                                                       |                                                                                                                                                       | → Schild regression analysis defined non-hallucinogenic ligands as competitive antagonists                                                                                                                                                     | → Figure 5D<br>Figure S6 |
| <b>Identification of new hallucinogenic and non-hallucinogenic compounds</b>                                          |                                                                                                                                                       |                                                                                                                                                                                                                                                |                          |
| Will predicted hallucinogens produce hallucinogenic behaviors?                                                        | → Performed a three-point dose-response study of 5-halo-DMT family measuring head-twitch response and locomotion                                      | → 5-F-DMT and 5-CI-DMT produce robust HTR as predicted by psychLight<br>5-Br-DMT did not produce a HTR as predicted by psychLight                                                                                                              | → Figure 5A–C            |
| What are the pharmacological features and behavioral effects of predicted non-hallucinogens, such as AAZ-A-154 ?      | → Performed Schild regression analysis<br>→ Performed a three-point dose-response study measuring head-twitch response and locomotion                 | → AAZ-A-154 is a competitive 5-HT2AR ligand that did not produce a HTR as predicted by psychLight                                                                                                                                              | → Figure 5D–F            |
| <b>Characterizing antidepressant-like effects of a novel non-hallucinogenic compound</b>                              |                                                                                                                                                       |                                                                                                                                                                                                                                                |                          |
| Can AAZ-A-154 promote dendritic growth in cultured neurons?<br>If yes, is the effect 5-HT2R dependent?                | → Performed Sholl analysis in cultured cortical neurons treated with AAZ-A-154 or vehicle in the presence and absence of 5HT2R antagonist ketanserin. | → AAZ-A-154 promoted dendritic growth. This effect can be blocked by ketanserin, implicating 5-HT2Rs in the mechanism of action                                                                                                                | → Figure 6A–C            |
| Does AAZ-A-154 have antidepressant potential?<br>If yes, is the effect comparable to Ketamine?                        | → Performed forced swim test                                                                                                                          | → AAZ-A-154 produces both rapid (30 min) and long-lasting (1 week) antidepressant-like effects after a single administration comparable to ketamine                                                                                            | → Figure 6D              |
|                                                                                                                       | → Measured anhedonia in a genetic animal model relevant to depression                                                                                 | → VMAT2-HET mutants exhibited a sucrose preference that was indistinguishable from WT controls after a single-administration and the effect was long-lasting (12-days)                                                                         | → Figure 6E              |
