# Supplementary material
Source: PubMed Central journal article supplement (PMC8122087)

Supplementary Figure 2

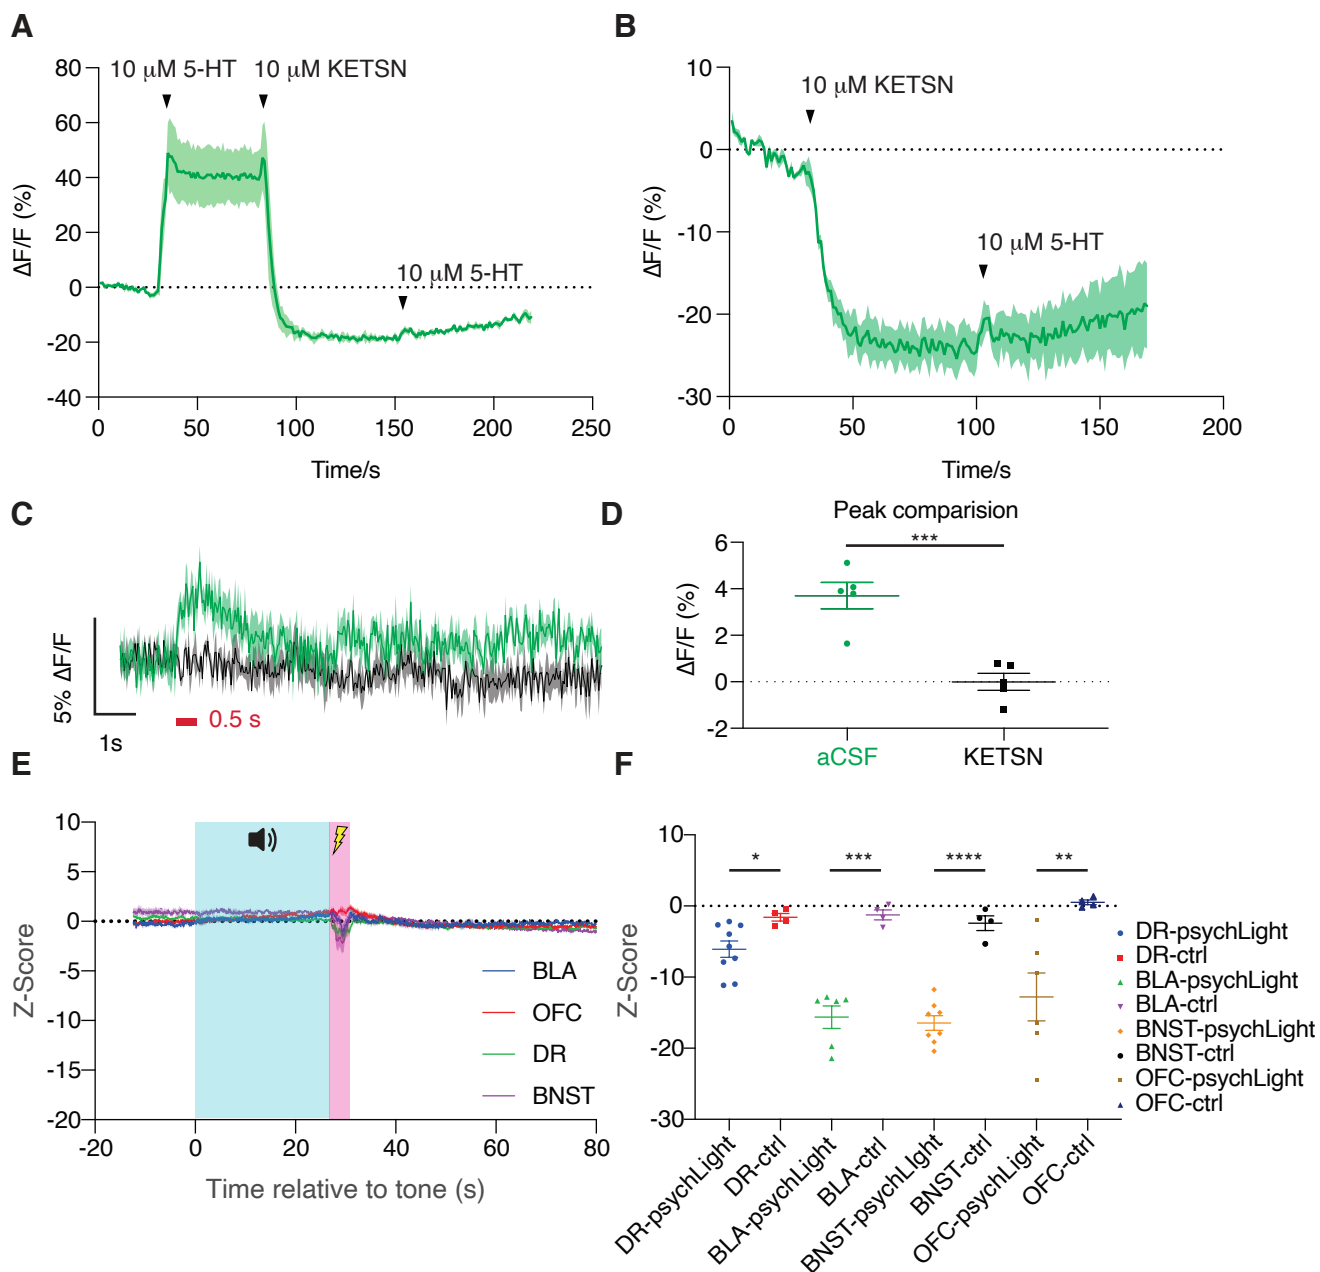

Supplement: NIHMS1692737-supplement-3.pdf [file NIHMS1692737-supplement-3.pdf]

### Supplementary Figure 3

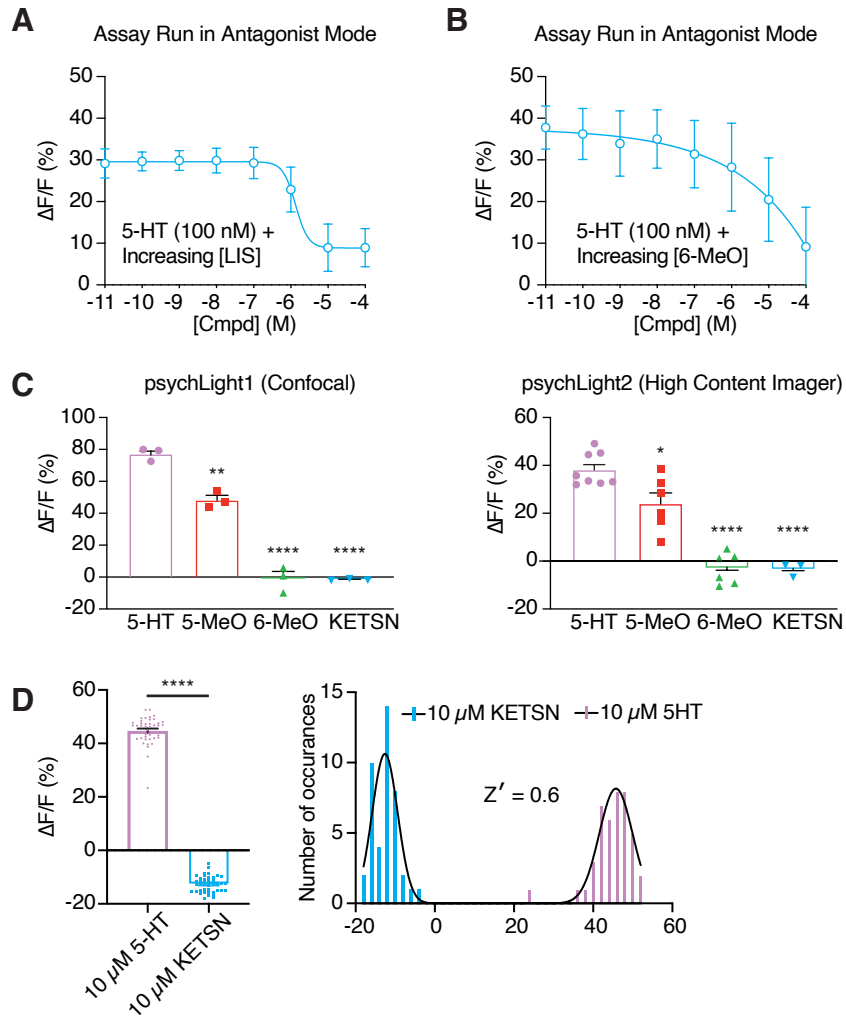

Supplement: NIHMS1692737-supplement-4.pdf [file NIHMS1692737-supplement-4.pdf]

# Supplementary Figure 4

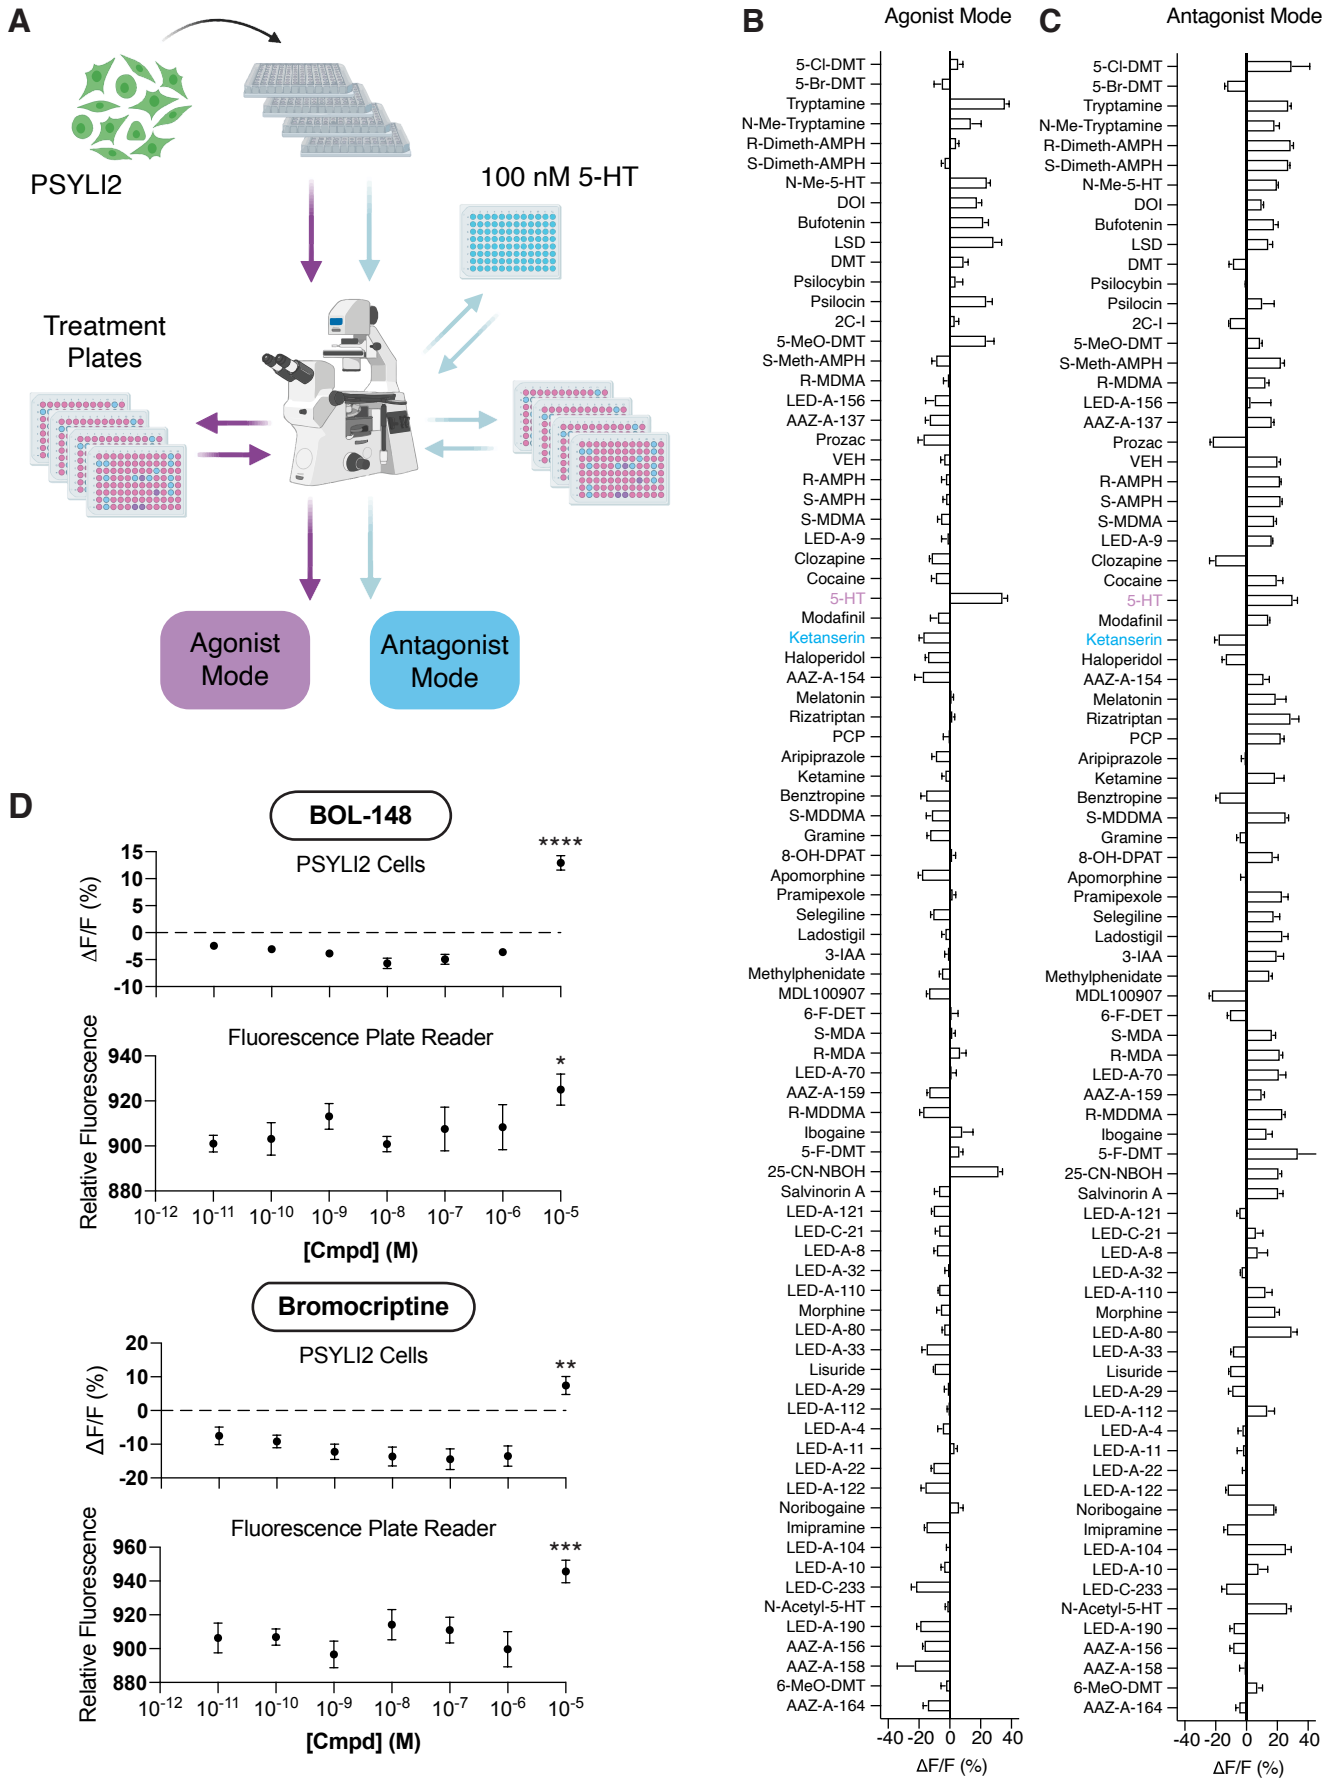

Supplement: NIHMS1692737-supplement-5.pdf [file NIHMS1692737-supplement-5.pdf]

## Supplementary Figure 5

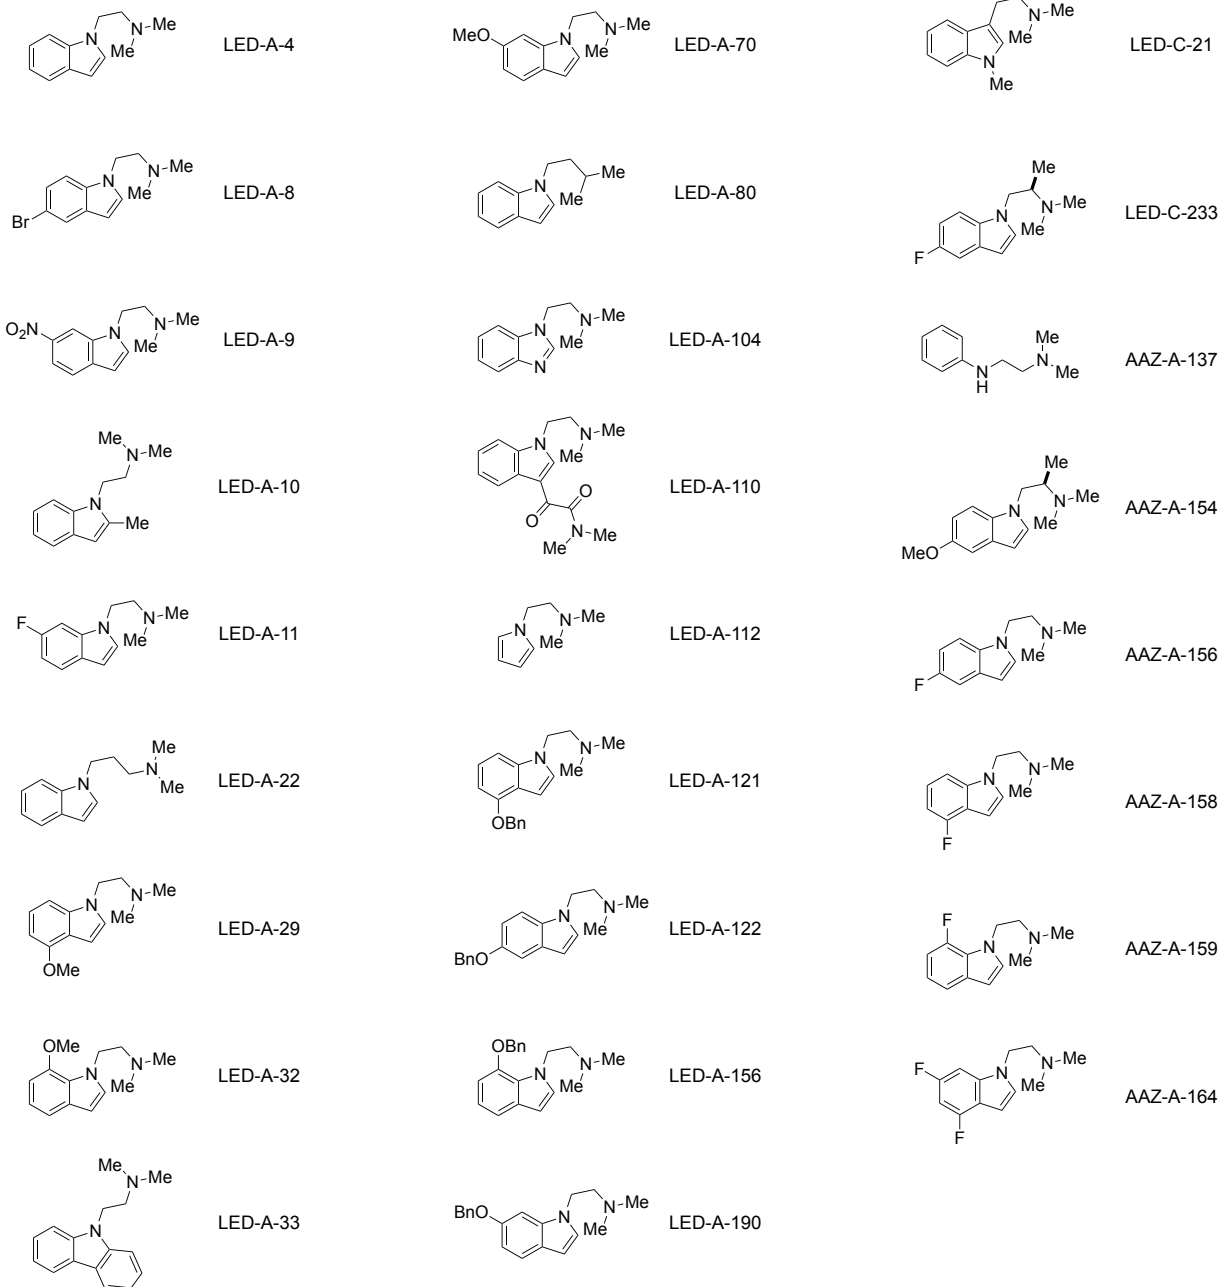

Supplement: NIHMS1692737-supplement-6.pdf [file NIHMS1692737-supplement-6.pdf]

Supplementary Figure 6

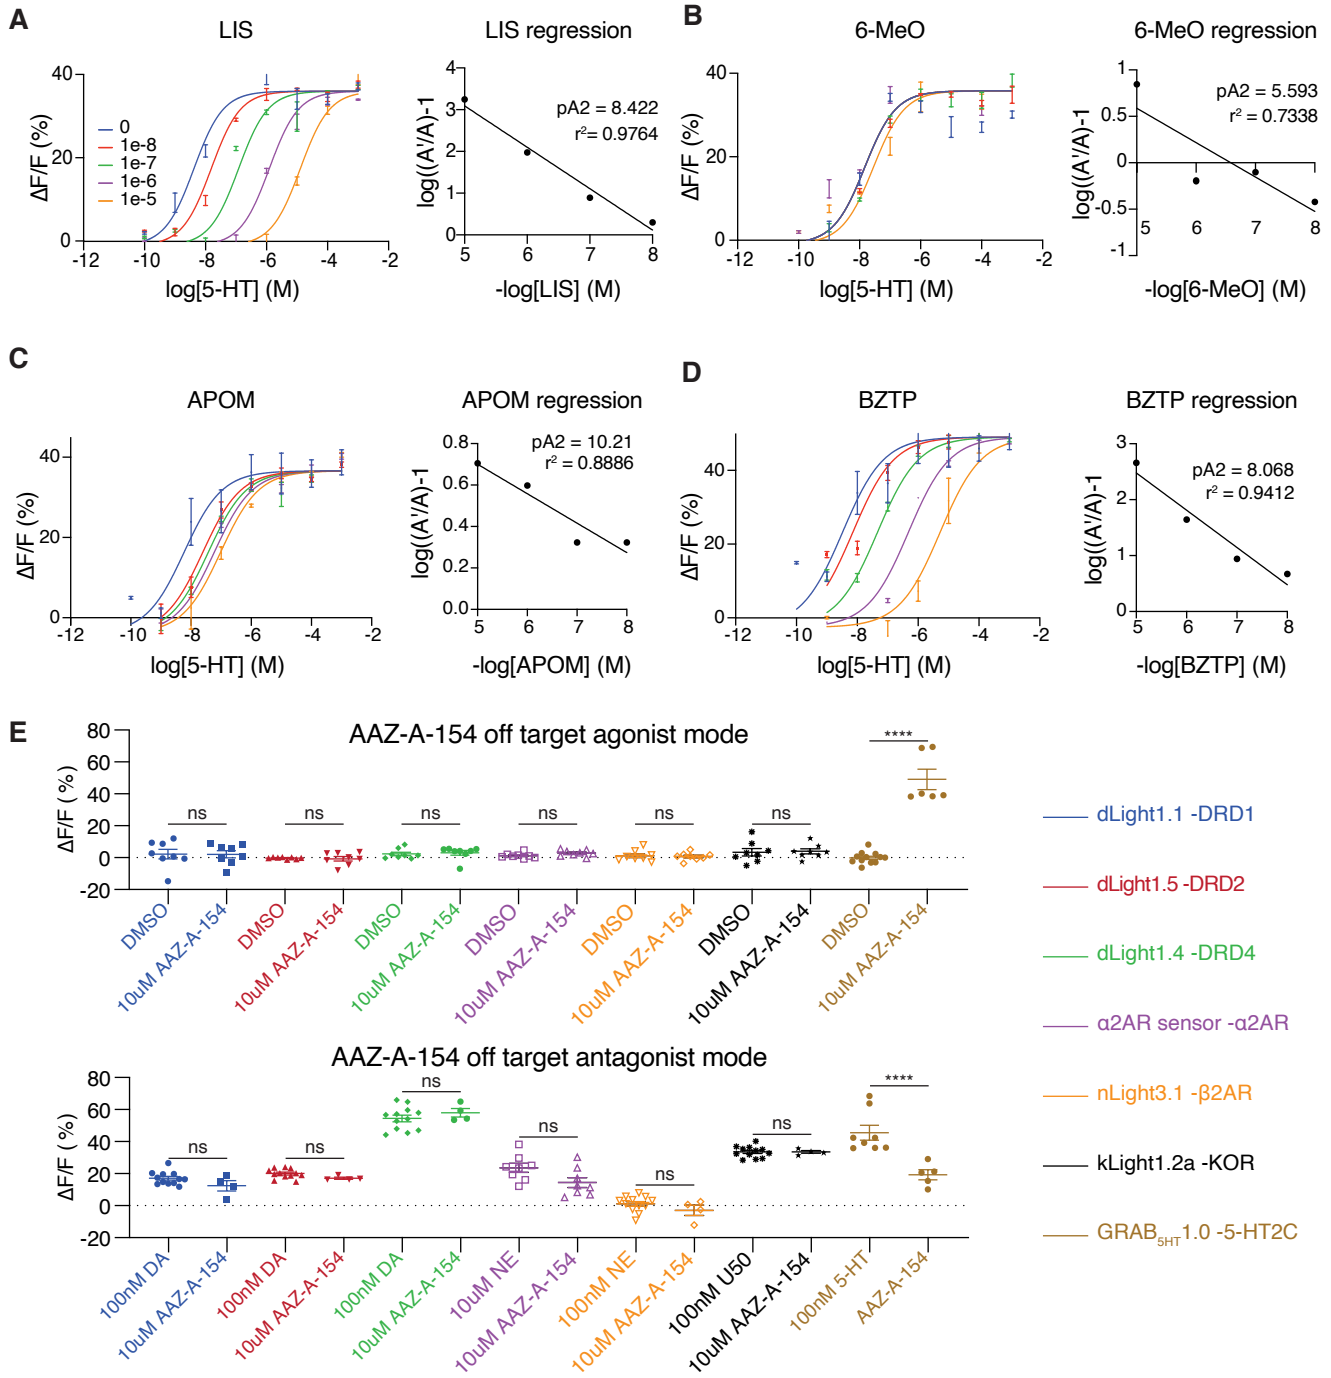

Supplement: NIHMS1692737-supplement-7.pdf [file NIHMS1692737-supplement-7.pdf]
